# Supplementary material
Source: PubMed Central journal article supplement (PMC7817132)
Supplement: pnas.2021996118.sapp.pdf [file pnas.2021996118.sapp.pdf]

**Supplemental Figure 1. Related to Figure 1.** **A.** Diagram of PE2 expression plasmid *pAct-PE2*. **B.** Schematic of experiments to detect and quantify insertion events in transfected S2R+ cells. **C.** DNA gel images of targeted PCR amplification of the insertion site. **D.** Sequence structure of 23bpBC insertion in *ebony* with sanger sequence chromatogram of PCR amplified insert. Features include the binding sites of *ebony\_F* and *BC\_R* (see B and C), pegRNA spacer, 23bpBC insertion site, and PAM. Asterisk indicates possible PCR or sequencing error. **E.** Approximate quantification of precise *ebony*<sup>23bpBC</sup> insertion and indel percentage from S2R+ transfection experiments by amplicon sequencing. **F.** *white* and *forked* genomic region showing target site and edits (*white*<sup>A134X</sup> and *forked*<sup>D111X</sup>).

**Supplemental Figure 2. Related to Figure 2.** Images of adult flies with somatic editing using *tub>PE2*. Views of the dorsal side of whole adults (top), scutellum (middle), and eye (bottom). Negative control is *attP40* and classical loss of function allele shown on right. Females shown for editing of *ebony* and *forked*, males shown for *white* editing.

**Supplemental Figure 3. Related to Figure 3.** **A.** Diagram of PE2 expression transgene *nos-PE2*. *nos*, *nanos*; NLS, Nuclear localization sequence; 3' UTR, *nanos* 3' UTR; *v+*, *vermillion+* rescue transgene; *attB*, phiC31 recombination site. **B-E.** Quantification of *ebony* transmission and edit type using transgenic crossing. pegRNA only = *pCFD3-PE-ebony*<sup>G111X</sup>, pegRNA + sgRNA = *pCFD5-PE3-ebony*<sup>G111X</sup>. Sex of G1 parents and sample size indicated on graph unless otherwise noted. **B-C.** Quantification G2 *ebony* progeny transmitted from single G1 crosses. Results from all single G1 crosses shown. Sample size of progeny counted for each cross is 76 or higher. **D-E.** Quantification of sequenced edit types in individual G2 flies from single G1 crosses.

**Supplemental Figure 4. Related to Figure 3.** **A-B.** Quantification of *ebony* transmission and edit type using embryo injection of plasmid DNA or synthetic pegRNA. **A.** Quantification G2 *ebony* progeny transmitted from single G1 crosses. Results from all single G1 crosses shown. Sample size of progeny counted for each cross is 41 or higher. **B.** Quantification of sequenced edit types in individual G2 flies from single G1 crosses.

**Supplemental Figure 5. Related to Figure 3.** **A.** Quantification of single G1 flies that transmit at least one *ebony* progeny (designated a founder) using *nos>PE2* II or *nos>PE2* III. **B-C.** Quantification G2 *ebony* progeny transmitted from single G1 crosses in **(A)**. **B.** Summed data from single G1 crosses. **C.** Data from all single G1 crosses. Sample size of progeny counted for each cross is 54 or higher.

**Supplemental File 1. pegRNA and sgRNA sequences**

**Supplemental File 2. Oligo and dsDNA sequences**

**Supplemental File 3. pegRNA design and cloning protocols**

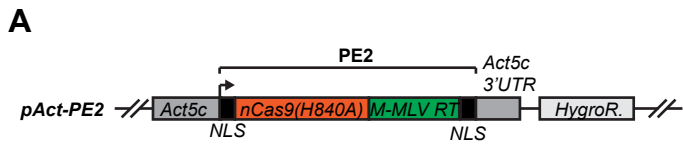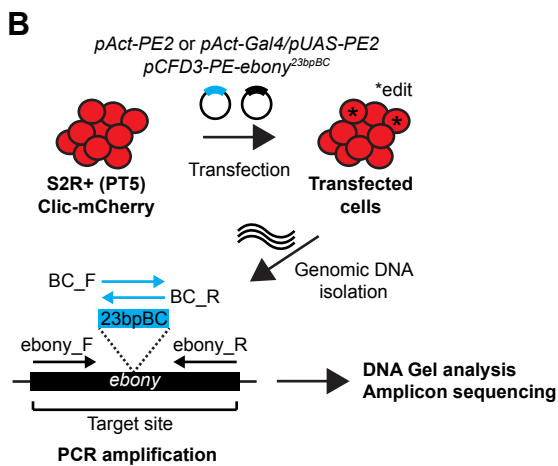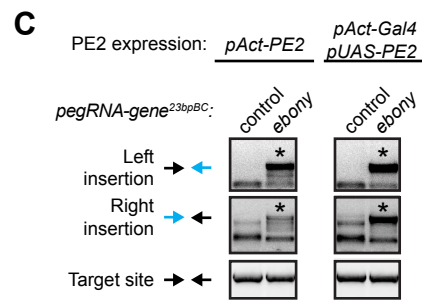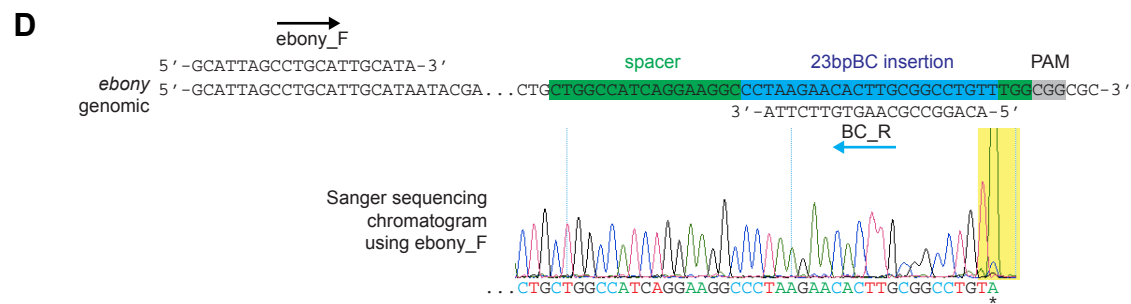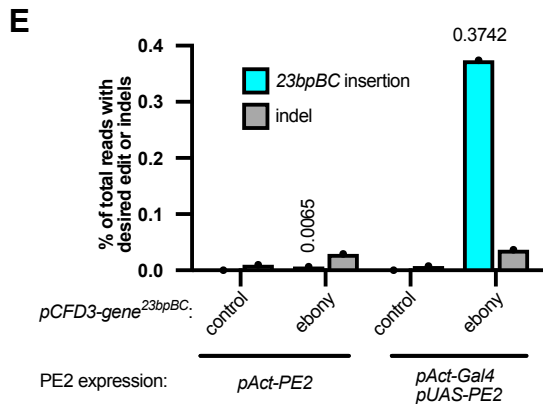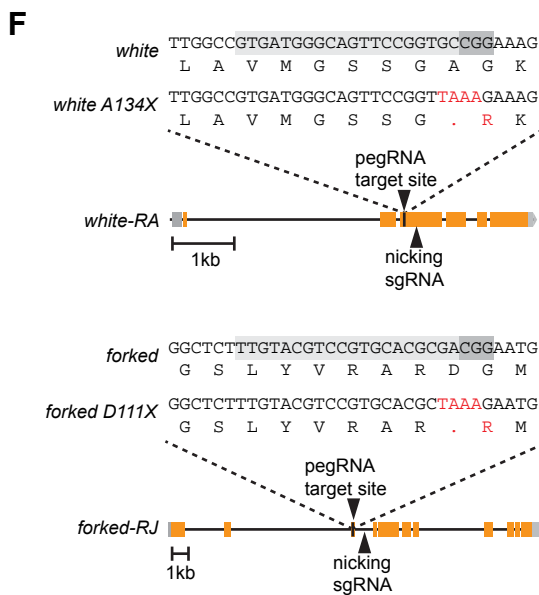

Supplemental Figure 1

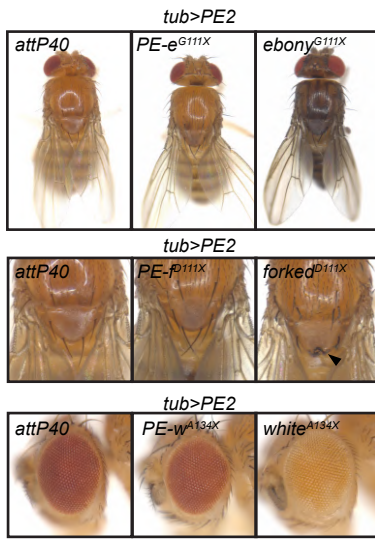

Supplemental Figure 2

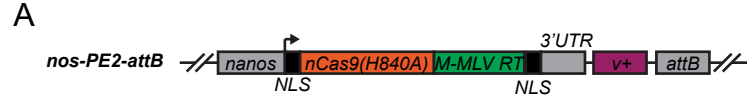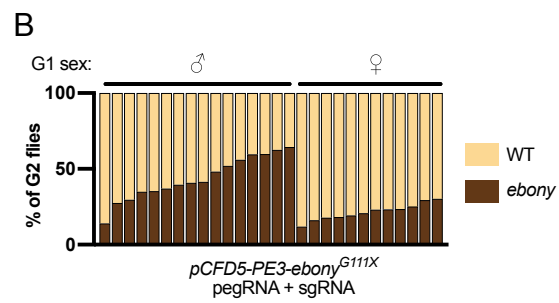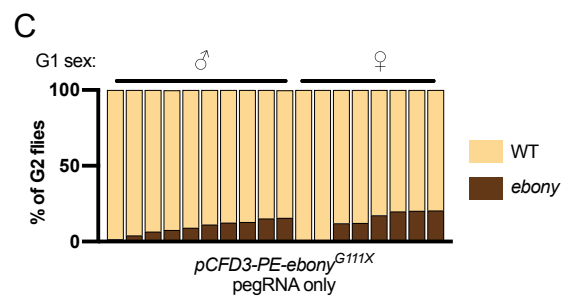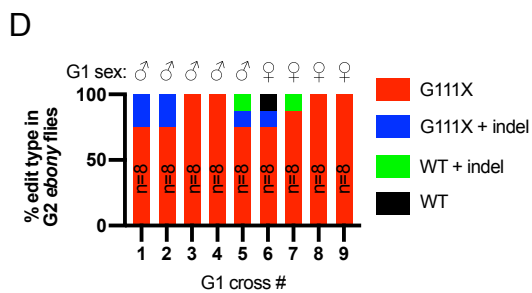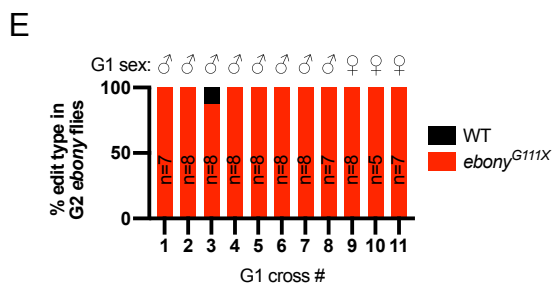

Supplemental Figure 3

A

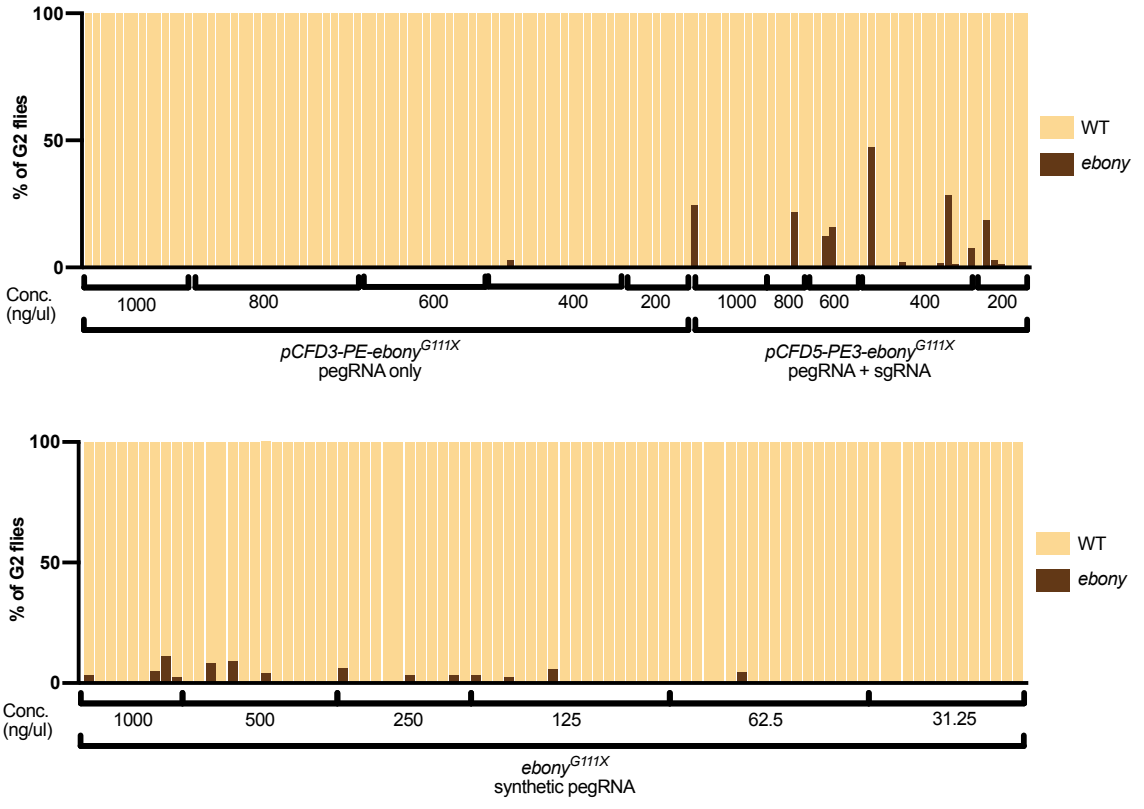

B

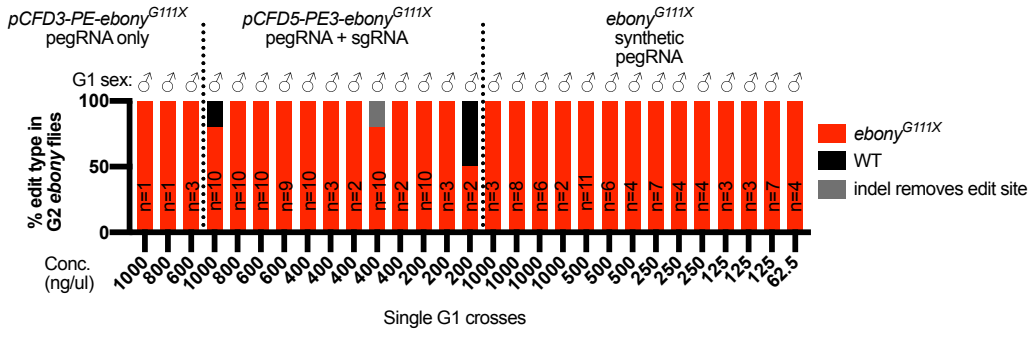

Supplemental Figure 4

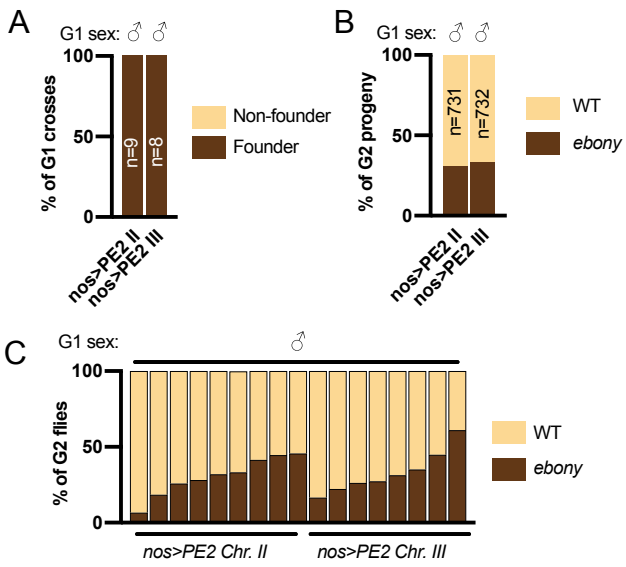

Supplemental Figure 5

| Supplemental File 1 - pegRNA and sgRNA sequences |                        |                                                                          |            |                    |               |                               |  |
|--------------------------------------------------|------------------------|--------------------------------------------------------------------------|------------|--------------------|---------------|-------------------------------|--|
| pegRNA                                           | pegRNA spacer sequence | 3' extension                                                             | PBS length | RT template length | nicking sgRNA | nicking sgRNA spacer sequence |  |
| ebony_pFP545_23bpBC                              | CTGGCCATCTGGAAAGGCTGG  | GAAGCTGGGATCGATGGGCAAAATACGCGCCGCCAaacagggccgaagtgttctttaggGCCTTCCAGATGG | 13         | 34                 |               |                               |  |
| ebony_pFP545_G111X                               | CTGGCCATCTGGAAAGGCTGG  | GGCAAAATACGCGCtttaAGCCTTCCAGATGG                                         | 13         | 18                 | ebony_+57     | GCTTCGCTCCAGAGTATG            |  |
| white_ex3-3_A134X                                | GTGATGGCAGTCCGCTGC     | AGGTCGTCTTTCtttaACCGAAGTCCCA                                             | 13         | 18                 | white_+70     | TTGAGCAGTCCATCCCGGA           |  |
| forked_pFP801_D111X                              | TTGTACGTCCGTGCACGCGA   | ATCGTGCATTCtttaGCGTGCACGGACGT                                            | 13         | 18                 | forked_+57    | ATCTACTCACCATCCATTG           |  |

| Supplemental File 2 - Oligo and dsDNA sequences |                                                                                                                                                                                                                                                                                                                                                                                                                                                         |                                                                                             |
|-------------------------------------------------|---------------------------------------------------------------------------------------------------------------------------------------------------------------------------------------------------------------------------------------------------------------------------------------------------------------------------------------------------------------------------------------------------------------------------------------------------------|---------------------------------------------------------------------------------------------|
| Name                                            | Sequence                                                                                                                                                                                                                                                                                                                                                                                                                                                | Purpose                                                                                     |
| JB1633_pCFD3-NS_gBlock_BbsI-XbaI                | agttcgtatataatagacctatcttcaatttaacgtcggggctctcgagaagacctt<br>tttttgctacctggagcctgagagttgttcaataaaaaataaaatgttctgtttt<br>ttgctttccgagctatttatttttcaatcaatgatcaatttggatgtgat<br>ttagtaattgtaataatagacaatgggtttccgtgacgtacacacatctgacgt<br>gtgtttatttagacataatagttatgttttcaacatcttttaagtctgcttaag<br>cgtatgcatcttagacaattgtgctcggcaacagtatatttgt                                                                                                           | gBlock to create pCFD3-NS                                                                   |
| JB1690_gBlock_pCFD5-NS                          | agttcgtatataatagacctatcttcaatttaacgtcggggctctcgagaagacctt<br>acatcaagcctcgggtggttcagtggtagaatgctcgcctgcaacgogggcggccg<br>ggttcgatcccgccgagtgcaaggctctcgagaagaccttcttttgctacctgg<br>agcctgagagttgttcaataaaaaataaaatgttctgttttttggcttcgocagta<br>tttatatttttcaatcaatgatcaatttggatgtattagtaattgtaata<br>tatagacaatgggtttccgtgacgtacacacatctgacgtgtgttatttagaca<br>taattagttatgttttcaacatcttttaagtctgcttaagtggtatgcatcttaga<br>caattgtgctcggcaacagtatatttgt | gBlock to create pCFD5-NS                                                                   |
| JB265_Gibson_pEntr_1F                           | AAGGTTGGGCGCCGCGAC                                                                                                                                                                                                                                                                                                                                                                                                                                      | Amplifies pEntr backbone for Gibson assembly                                                |
| JB266_Gibson_pEntr_1R                           | GGTGAAGGGCGCCGCGC                                                                                                                                                                                                                                                                                                                                                                                                                                       | Amplifies pEntr backbone for Gibson assembly                                                |
| JB1615_PE2_pEntr_F                              | ccggccgcgccccctccaccatgaaacggacagccgac                                                                                                                                                                                                                                                                                                                                                                                                                  | Amplifies PE2 coding sequence to assemble with pEntr backbone by Gibson                     |
| JB1616_PE2_stop_pEntr_R                         | gggtcggcggcccccaccttttagactttctctctctctcttggg                                                                                                                                                                                                                                                                                                                                                                                                           | Amplifies PE2 coding sequence to assemble with pEntr backbone by Gibson                     |
| JB1613_PE2-nosbackbone_XbaI-AvrII_F             | TCGCCTGAATTGagatctctCTAGAggtacCGCCACatgaaacggacagccgac                                                                                                                                                                                                                                                                                                                                                                                                  | Amplifies PE2 coding sequence to assemble with pNos backbone by Gibson                      |
| JB1614_PE2-nosbackbone_XbaI-AvrII_R             | TAAACCTcagtggtgctctctctaggtgctagAtttagactttctctctctcttggg                                                                                                                                                                                                                                                                                                                                                                                               | Amplifies PE2 coding sequence to assemble with pNos backbone by Gibson                      |
| JB157_Gibson_MT-GW_backbone_1F                  | ACCGAGAGCATCTGGCCA                                                                                                                                                                                                                                                                                                                                                                                                                                      | Amplifies MK33-GW backbone to assemble with Actin5c promoter                                |
| JB158_Gibson_MT-GW_backbone_1R                  | GATCCAGACATGATAAGATACATTGATGAG                                                                                                                                                                                                                                                                                                                                                                                                                          | Amplifies MK33-GW backbone to assemble with Actin5c promoter                                |
| JB159_Gibson_MT-GW_actP_1F                      | tatcttatcatgtctggatcGCATGCAATTCATATCTATAAAAACACAAATG                                                                                                                                                                                                                                                                                                                                                                                                    | Amplifies Actin5c promoter to insert into MK33-GW by Gibson                                 |
| JB160_Gibson_MT-GW_actP_1R                      | atggccagatgctctcggTATCGATCCGGGCTCTC                                                                                                                                                                                                                                                                                                                                                                                                                     | Amplifies Actin5c promoter to insert into MK33-GW by Gibson                                 |
| ebony_targetsite_F                              | GAGGATTTGGTACCACACT                                                                                                                                                                                                                                                                                                                                                                                                                                     | Amplifies indicated target site from genomic DNA, used to amplify in ebony23pBC experiments |
| ebony_targetsite_2F                             | CCGGTTCCTCGACCCAAACA                                                                                                                                                                                                                                                                                                                                                                                                                                    | Amplifies indicated target site from genomic DNA, used to amplify in ebonyG111X experiments |
| ebony_targetsite_R                              | GGGATTTGGCATACAGTTCC                                                                                                                                                                                                                                                                                                                                                                                                                                    | Amplifies indicated target site from genomic DNA                                            |
| white_targetsite_F                              | TTCCGAGTCCGCTGATCTGT                                                                                                                                                                                                                                                                                                                                                                                                                                    | Amplifies indicated target site from genomic DNA                                            |
| white_targetsite_R                              | CACAGGTTGGCCATTGAGCA                                                                                                                                                                                                                                                                                                                                                                                                                                    | Amplifies indicated target site from genomic DNA                                            |
| forked_targetsite_F                             | ACGATGTCACGCCCGTTTAC                                                                                                                                                                                                                                                                                                                                                                                                                                    | Amplifies indicated target site from genomic DNA                                            |
| forked_targetsite_R                             | CAACTGCTCGAGTTGGCCAA                                                                                                                                                                                                                                                                                                                                                                                                                                    | Amplifies indicated target site from genomic DNA                                            |
| JB1647_BC_F                                     | TAAGAACACTTGGCGCTGT                                                                                                                                                                                                                                                                                                                                                                                                                                     | Binds to inserted 23bp BC for amplification of insertions                                   |
| JB1647_BC_R                                     | CACGCCCGCAAGTGTCTTA                                                                                                                                                                                                                                                                                                                                                                                                                                     | Binds to inserted 23bp BC for amplification of insertions                                   |
| JB1637_scaffold_top                             | GTTTTAGAGCTAGAAATAGCAAGTTAAATTAAGGCTAGTCCGTTATCAACTTGAAA<br>AAGTGGCAACGACTCG                                                                                                                                                                                                                                                                                                                                                                            | sgRNA scaffold for annealing and cloning a pegRNA into pCFD3-NS                             |
| JB1638_scaffold_bot                             | GCACGACTCGGTCGCACCTTTTCAAGTTGATAACGACTAGCCTATTTTAACTT<br>GCTATTCTTAGCTCTA                                                                                                                                                                                                                                                                                                                                                                               | sgRNA scaffold for annealing and cloning a pegRNA into pCFD3-NS                             |
| JB1639_ebony_pFP545_spacer_top                  | gtcgcCTGGCCATCTGGAAGGCTGG                                                                                                                                                                                                                                                                                                                                                                                                                               | ebony_23pBC pegRNA spacer for annealing and cloning into pCFD3-NS                           |
| JB1640_ebony_pFP545_spacer_bot                  | aaacCCAGCCTCTCCAGATGGCCAG                                                                                                                                                                                                                                                                                                                                                                                                                               | ebony_23pBC pegRNA spacer for annealing and cloning into pCFD3-NS                           |
| JB1641_ebony_pFP545_3'ext_top                   | gtgcGAAAGCTGGAGTCGATGGGCAAAATACGCGCCCAACAGGCCGCAAGTGTTC<br>TTAGGCCCTCCAGATGG                                                                                                                                                                                                                                                                                                                                                                            | ebony_23pBC pegRNA 3'extension for annealing and cloning into pCFD3-NS                      |
| JB1642_ebony_pFP545_3'ext_bot                   | aaaaCCATCTGGAAGGCCCTAAGAACACTTGGCGCCTGTTTGGCGGCCGATTTTG<br>CCATCGATCCAGCTTC                                                                                                                                                                                                                                                                                                                                                                             | ebony_23pBC pegRNA 3'extension for annealing and cloning into pCFD3-NS                      |
| JB1721_pCFD5-NS_ebony_pFP545_G111X_PE3_gBlock1  | cggttcgatcccgccgagtcgacgtctgcctccagcagataggttttagagcta<br>gaaatagcaagttaaaataaggctagtcogttatcaacttgaaaaagtgccaccca<br>gtcgggtgctaacaagcaccagtggtctagtggtagaatagtagtaccctgccacggta<br>cagacc                                                                                                                                                                                                                                                             | ebonyG111X sgRNA-trRNA-pegRNA to clone into pCFD5-NS                                        |
| JB1724_pCFD5-NS_ebony_pFP545_G111X_PE3_gBlock2  | taacaaagcaccagtggtctagtggtagaatagtagtaccctgccacggtaacagaccg<br>ggttcgattcccgctggtgcaactggcaatcggaaaggtgggttttagagctaga<br>aatagcaagttaaaataaggctagtcogttatcaacttgaaaaagtgccaccca<br>cggtgcGCCAAATACGCGCcttaAGCCTCCAGATGGTtttttgctacctggagc<br>ctgag                                                                                                                                                                                                     | ebonyG111X sgRNA-trRNA-pegRNA to clone into pCFD5-NS                                        |
| JB1722_pCFD5-NS_white_ex3-3_A134X_PE3_gBlock1   | cggttcgatcccgccgagtcgacgtctgcctccagcagataggttttagagcta<br>gaaatagcaagttaaaataaggctagtcogttatcaacttgaaaaagtgccaccca<br>gtcgggtgctaacaagcaccagtggtctagtggtagaatagtagtaccctgccacggta<br>cagacc                                                                                                                                                                                                                                                             | whiteA134X sgRNA-trRNA-pegRNA to clone into pCFD5-NS                                        |
| JB1725_pCFD5-NS_white_ex3-3_A134X_PE3_gBlock2   | taacaaagcaccagtggtctagtggtagaatagtagtaccctgccacggtaacagaccg<br>ggttcgattcccgctggtgcaactggcaatcggaaaggtgggttttagagctaga<br>aatagcaagttaaaataaggctagtcogttatcaacttgaaaaagtgccaccca<br>cggtgcAGGTCCTCTTTCTcttaACCGAACTGCCAttttttgctacctggagc<br>ctgag                                                                                                                                                                                                      | whiteA134X sgRNA-trRNA-pegRNA to clone into pCFD5-NS                                        |
| JB1723_pCFD5-NS_forked_pFP801_D111X_PE3_gBlock1 | cggttcgatcccgccgagtcgacgtctgcctccagcagataggttttagagcta<br>gaaatagcaagttaaaataaggctagtcogttatcaacttgaaaaagtgccaccca<br>gtcgggtgctaacaagcaccagtggtctagtggtagaatagtagtaccctgccacggta<br>cagacc                                                                                                                                                                                                                                                             | forkedD111X sgRNA-trRNA-pegRNA to clone into pCFD5-NS                                       |
| JB1726_pCFD5-NS_forked_pFP801_D111X_PE3_gBlock2 | taacaaagcaccagtggtctagtggtagaatagtagtaccctgccacggtaacagaccg<br>ggttcgattcccgctggtgcaactgtagtcogtgcacgcaggttttagagctaga<br>aatagcaagttaaaataaggctagtcogttatcaacttgaaaaagtgccaccca<br>cggtgcATCGGTGCCATTTcttaAGCGTGCACGGAGCTtttttgctacctggagc<br>ctgag                                                                                                                                                                                                    | forkedD111X sgRNA-trRNA-pegRNA to clone into pCFD5-NS                                       |



**Supplemental File 3**  
**pegRNA cloning for Prime Editing in *Drosophila*, Nov. 2020, Version 1.0**  
 Justin Bosch, Perrimon Lab, Harvard Medical School

**Table of contents**

- A. Introduction
- B. pegRNA and nicking sgRNA design
- C. Oligo and dsDNA design
- D. Cloning protocol for *pCFD3-NS* using annealed oligos
- E. Cloning protocol for *pCFD3-NS* using a dsDNA fragment
- F. Cloning protocol for *pCFD5-NS* using two dsDNA fragments

**A. Introduction:** These protocols are used to assemble plasmids to express pegRNAs under the control of the *Drosophila U6-3* promoter. pegRNAs are designed to make a precise edit in the genome, and optional nicking sgRNAs are designed to enhance prime editing efficiency (PE3 system). To express pegRNAs and sgRNAs, they are encoded in annealed oligos or dsDNA fragments, and then cloned into one of two empty expression plasmids. *pCFD3-NS* is used for expression of a single pegRNA. *pCFD5-NS* is used for expression of a pegRNA/sgRNA pair. *pCFD3-NS* and *pCFD5-NS* do not contain a sgRNA scaffold (NS = No Scaffold), and are slight modifications of the sgRNA-expression plasmids *pCFD3* and *pCFD5* (1, 2). *pCFD3-NS* and *pCFD5-NS* contain an *attB* site for phiC31 integration and a *vermillion+* marker to select transgenic flies.

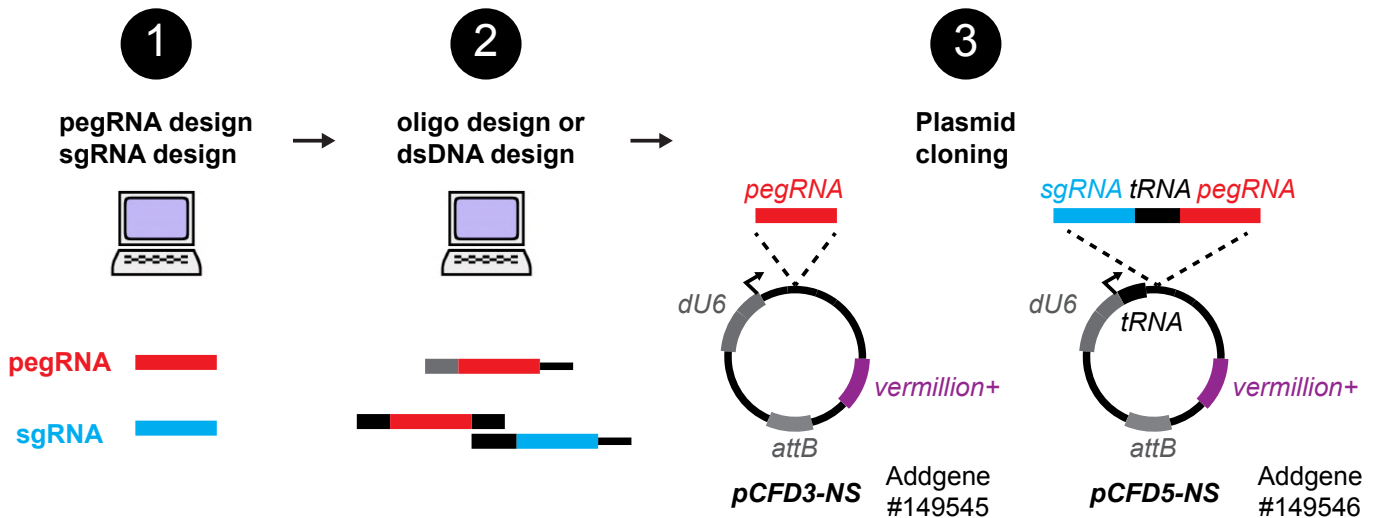

**Summary of pegRNA-expression plasmids:**

| Plasmid         | Addgene # | Promoter     | Used to express | Cloning methods           | Fly marker         | Bacterial resistance |
|-----------------|-----------|--------------|-----------------|---------------------------|--------------------|----------------------|
| <i>pCFD3-NS</i> | 149545    | <i>dU6:3</i> | pegRNA          | Annealed oligos/T4 Ligase | <i>vermillion+</i> | Ampicillin           |
|                 |           |              |                 | 1 dsDNA fragment/Gibson   |                    |                      |
| <i>pCFD5-NS</i> | 149546    | <i>dU6:3</i> | sgRNA + pegRNA  | 2 dsDNA fragments/Gibson  | <i>vermillion+</i> | Ampicillin           |

## B. pegRNA and nicking sgRNA design

Automatic design (recommended):

PrimeDesign (3): <http://primedesign.pinellolab.org/>

pegFinder (4): <http://pegfinder.sidichenlab.org/>

Manual design (optional):

1. Create wild-type (WT) and edited sequence files for annotation
2. WT sequence - select a pegRNA spacer near the desired edit, ensuring the edit is 3' to nick site.
3. Edited sequence - annotate the primer binding site (PBS) by selecting ~13bp 5' to the nick site.
4. Edited sequence - annotate the reverse transcribed (RT) region by selecting ~13-18bp 3' to nick site.
5. Edited sequence - The reverse complement of the PBS-edit-RT sequence is the pegRNA 3' extension.
6. WT sequence - select a sgRNA target on the non-edited strand between +40 and +90 from the pegRNA nick.

Notes:

- Avoid starting pegRNA 3' extension with a "C".
- Edits or silent mutations that affect the PAM or pegRNA spacer sequence increase efficiency.
- Use a shorter RT sequence if region has high G:C content.

Example pegRNA and nicking sgRNA design:

pegRNA spacer

nicking sgRNA spacer

PAM

nick = |

PBS

RT

edit

scaffold

>ebony\_WT

```
CCGGTTCCTGCAGCCAAACAGCGATGGTGACTTCATCGTGGCTGTGTGCATGCAGCCGTCGGAGGGATTGGTCACCACACT
GCTGGCCATCTGGAAGGC | TGGCGGCGCGTATTTGCCATCGATCCCAGCTTCCCGGCGAACCGCATTCACCACAT | ACTG
CTGGAGGCGAAGC CCACCTTGGTGATTTCGCGACGATGACATCGACGCCGCGCTTCCAGGGAACTCCCACGTTATCCACC
ACCGAACTGTATGCCAAATCCC
```

>ebony\_GGCG331-334TAAA\_G111X

```
CCGGTTCCTGCAGCCAAACAGCGATGGTGACTTCATCGTGGCTGTGTGCATGCAGCCGTCGGAGGGATTGGTCACCACACT
GCTGGCCATCTGGAAGGC TtaaGCGCGTATTTGCCATCGATCCCAGCTTCCCGGCGAACCGCATTCACACATACTGCT
GGAGGCGAAGCCCACCTTGGTGATTTCGCGACGATGACATCGACGCCGCGCTTCCAGGGAACTCCCACGTTATCCACC
CGAACTGTATGCCAAATCCC
```

>pegRNA\_spacer

CTGGCCATCTGGAAGGCTGG

>pegRNA\_extension

GGCAAATACGCGC~~ttaa~~GCCTTCCAGATGG

>nicking\_sgRNA\_spacer

GCTTCGCCTCCAGCAGTATG

>pegRNA

CTGGCCATCTGGAAGGCTGGGTTTTAGAGCTAGAAATAGCAAGTTAAATAAAGGCTAGTCCGTTATCAACTTGAAAAAGTG
GCACCGAGTCGGTGC GGCAAATACGCGC~~ttaa~~GCCTTCCAGATGG

>nicking\_sgRNA

GCTTCGCCTCCAGCAGTATGGTTTTAGAGCTAGAAATAGCAAGTTAAATAAAGGCTAGTCCGTTATCAACTTGAAAAAGTG
GCACCGAGTCGGTGC

## C. Oligo and dsDNA design

### C1. For cloning into pCFD3-NS by T4 ligation (single pegRNA) (See section D)

Order oligos with overhangs (5' lowercase sequence)

>pegRNA\_spacer\_top

gtcgCTGGCCATCTGGAAGGCTGG

>pegRNA\_spacer\_bot

aaacCCAGCCTTCCAGATGGCCAG

>Scaffold\_top:

gtttTAGAGCTAGAAATAGCAAGTTAAAATAAGGCTAGTCCGTTATCAACTTGAAAAAGTGGCACCGAGTCG

>Scaffold\_bot:

gcacCGACTCGGTGCCACTTTTTCAAGTTGATAACGGACTAGCCTTATTTTAACTTGCTATTTCTAGCTCTA

>pegRNA\_extension\_top

gtgcGGCAAATACGCGCttaAGCCTTCCAGATGG

>pegRNA\_extension\_bot

aaaaCCATCTGGAAGGCttaaaGCGCGTATTTGCC

Annealed oligos:

>pegRNA\_spacer

5'-gtcgCTGGCCATCTGGAAGGCTGG-3'  
3'-GACCGGTAGACCTTCCGACCaaa-5'

>Scaffold

5'-gtttTAGAGCTAGAAATAGCAAGTTAAAATAAGGCTAGTCCGTTATCAACTTGAAAAAGTGGCACCGAGTCG-3'  
3'-ATCTCGATCTTTATCGTTCAATTTTATTCCGATCAGGCAATAGTTGAACTTTTTACCCTGGCTCAGCcacg-5'

>pegRNA\_extension

5'-gtgcGGCAAATACGCGCttaAGCCTTCCAGATGG-3'  
3'-CCGTTTATGCGCGaaatTCGGAAGGTCTACCaaaa-5'

Cloning:

>pCFD3-NS cut w/ BbsI

5'-agacctatthttcaatttaac ttttttgctacctggagcctgag-3'  
3'-tctggataaaaagttaaattgcagc aacggatggacctcggactc-5'

>pCFD3-pegRNA\_final

agacctatthttcaatttaacgtcgCTGGCCATCTGGAAGGCTGGGTTTTAGAGCTAGAAATAGCAAGTTAAAATAAGGC  
TAGTCCGTTATCAACTTGAAAAAGTGGCACCGAGTCGGTGC GGCAAATACGCGCttaAGCCTTCCAGATGG ttttttg  
cctacctggagcctgag

### C2. dsDNA to clone into pCFD3-NS by Gibson assembly (single pegRNA) (See section E)

Append homology arms (black, lowercase) to pegRNA that overlap with pCFD3-NS cut w/ BbsI.

>dsDNA\_fragment\_pCFD3-NS

agacctatthttcaatttaacgtcgCTGGCCATCTGGAAGGCTGGGTTTTAGAGCTAGAAATAGCAAGTTAAAATAAGGC  
GGCTAGTCCGTTATCAACTTGAAAAAGTGGCACCGAGTCGGTGC GGCAAATACGCGCttaAGCCTTCCAGATGGt  
tttttgctacctggagcctgag

## Cloning:

```
>pCFD3-NS cut w/ BbsI
5'-agacctatTTTcaatttaac          ttttttgctacctggagcctgag-3'
3'-tctggataaaaagttaaattgcagc    aacggatggacctcggactc-5'
```

```
>pCFD3-pegRNA_final
agacctatTTTcaatttaacgctcGCTGGCCATCTGGAAGGCTGGGTTTTAGAGCTAGAAATAGCAAGTTAAAATAAGGC
TAGTCCGTTATCAACTTGAAAAAGTGGCACCGAGTCGGTGC GGCAAATACGCGCtTTAAGCCTTCCAGATGG ttttttg
cctacctggagcctgag
```

Note: If needed, homology arms can be extended longer (~100bp each). This can help decrease complexity scores using IDT gBlocks.

### C3. dsDNAs to clone into pCFD5-NS by Gibson assembly (nicking sgRNA and pegRNA) (See section F)

Append homology arms (black, lowercase) to nicking sgRNA and pegRNA that overlap with pCFD3-NS cut w/ BbsI and encode rice Os-tRNA<sup>Gly</sup> (lowercase, italic)

```
>dsDNA_fragment1_pCFD5-NS
cgggttcgattcccggccgatgcaGCTTCGCCTCCAGCAGTATGGTTTTAGAGCTAGAAATAGCAAGTTAAAATAA
GGCTAGTCCGTTATCAACTTGAAAAAGTGGCACCGAGTCGGTGC aacaaagcaccagtgggtctagtggtagaatag
taccctgccacggtacagacc
```

```
>dsDNA_fragment2_pCFD5-NS
aacaaagcaccagtgggtctagtggtagaatagtagtaccctgccacggtacagaccgggttcgattcccggctgggtgc
aCTGGCCATCTGGAAGGCTGGGTTTTAGAGCTAGAAATAGCAAGTTAAAATAAGGCCTAGTCCGTTATCAACTTGAA
AAAGTGGCACCGAGTCGGTGC GGCAAATACGCGCtTTAAGCCTTCCAGATGG ttttttgctacctggagcctgag
```

```
>pCFD5-sgRNA-tRNA-pegRNA_final
cgggttcgattcccggccgatgcaGCTTCGCCTCCAGCAGTATGGTTTTAGAGCTAGAAATAGCAAGTTAAAATAA
GGCTAGTCCGTTATCAACTTGAAAAAGTGGCACCGAGTCGGTGC aacaaagcaccagtgggtctagtggtagaatag
taccctgccacggtacagaccgggttcgattcccggctgggtgcaCTGGCCATCTGGAAGGCTGGGTTTTAGAGCT
AGAAATAGCAAGTTAAAATAAGGCTAGTCCGTTATCAACTTGAAAAAGTGGCACCGAGTCGGTGC GGCAAATACGC
GCtTTAAGCCTTCCAGATGG ttttttgctacctggagcctgag
```

## D. Cloning protocol for *pCFD3-NS* (Addgene # 149545) using annealed oligos

**D1. Design pegRNA and order oligos (see Sections B&C).**

**D2. Digest/dephosphorylate *pCFD3-NS***

5µg *pCFD3-NS*  
3µl Bpil (cuts BbsI) (Fermentas, FD1014)  
3µl FastAP (Fermentas, EF0651)  
6µl 10x FastDigest Buffer  
Xµl H<sub>2</sub>O  
60ul total

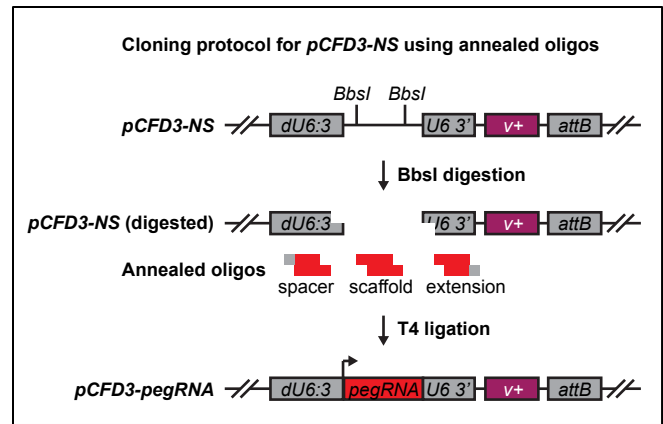

**D3. Gel-purify digested *pCFD3-NS* backbone (~6.2kb).**

**D4. Phosphorylate and anneal each pair of oligos in PCR tubes**

1µl Top oligo (100µM)  
1µl Bottom oligo (100µM)  
1µl 10x T4 Ligation buffer (NEB, B0202S)  
6.5µl H<sub>2</sub>O  
.5µl T4 PNK (NEB, M0201)  
10µl total

37°C for 30min, 95°C for 5min, then ramp down to 25°C at 5°C/min

**D5. Dilute annealed/phosphorylated oligos 1:200 in H<sub>2</sub>O**

**D6. Ligate annealed oligos into digested *pCFD3-NS***

Xµl digested *pCFD3-NS* (50ng)  
1µl **spacer** diluted annealed oligo  
1µl **scaffold** diluted annealed oligo  
1µl **3' extension** diluted annealed oligo  
1.5µl 10x T4 Ligation Buffer (NEB, B0202S)  
Xµl H<sub>2</sub>O  
1µl T4 DNA ligase (NEB, M0202)  
15µl total

Incubate reaction at room temperature for 30min.

**D7. Transform ligation into competent cells and grow colonies on LB-agar Ampicillin plates**

**D8. (Optional) Colony PCR to identify candidate pegRNA plasmids**

*pCFD3*genoF ACGTTTTATAACTTATGCCCTAAG  
*pCFD3*genoR GCCGAGCACAATTGTCTAGAATGC

Uncut backbone = 490bp  
Correct insert = 638bp (depends on pegRNA length)

**D9. Culture colonies with LB + Ampicillin and sequence confirm plasmids**

*pCFD3*seqF ACCTACTCAGCCAAGAGGC

## E. Cloning protocol for *pCFD3-NS* (Addgene # 149545) using a dsDNA fragment

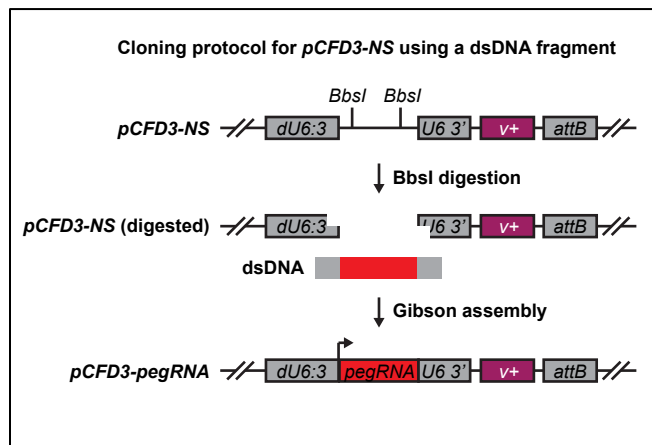

**E1. Design pegRNA and order dsDNA fragment (see Sections B&C).**

**E2. Digest/dephosphorylate plasmid**

5µg *pCFD3-NS*  
3µl BpiI (cuts BbsI) (Fermentas, FD1014)  
3µl FastAP (Fermentas, EF0651)  
6µl 10x FastDigest Buffer  
Xµl H<sub>2</sub>O  
60ul total

**E3. Gel-purify digested *pCFD3-NS* backbone (~6.2kb).**

**E4. Gibson assembly**

Xµl digested *pCFD3-NS* (50ng)  
Xµl dsDNA fragment (5ng)  
2.5µl Gibson master mix (NEB, E2611)  
Xµl H<sub>2</sub>O  
5µl total

Incubate reaction at 50°C for 30min.

**E5. Transform ligation into competent cells and grow colonies on LB-agar Ampicillin plates**

**E6. (Optional) Colony PCR to identify candidate pegRNA plasmids**

*pCFD3*genoF ACGTTTTATAACTTATGCCCCTAAG  
*pCFD3*genoR GCCGAGCACAATTGTCTAGAATGC

Uncut backbone = 490bp  
Correct insert = 638bp (depends on pegRNA length)

**E7. Culture colonies with LB + Ampicillin and sequence confirm plasmids**

*pCFD3*seqF ACCTACTCAGCCAAGAGGC

## F. Cloning protocol for *pCFD5-NS* (Addgene # 149546) using two dsDNA fragments

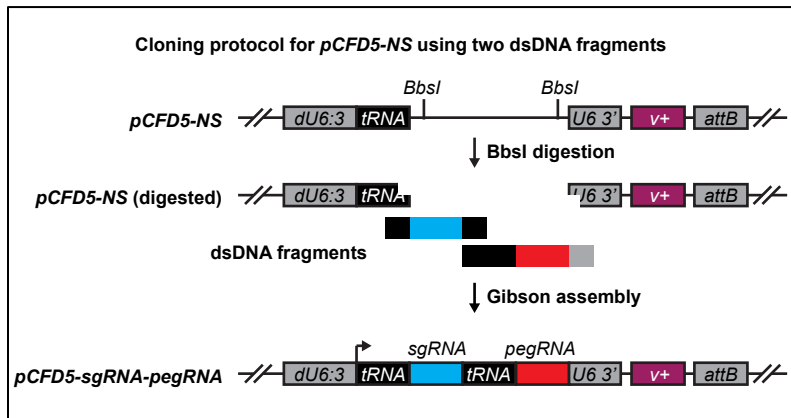

**F1. Design pegRNA and nicking sgRNA, and order dsDNA fragments (see Sections B&C).**

**F2. Digest/dephosphorylate plasmid**

5µg *pCFD5-NS*  
3µl Bpil (cuts BbsI) (Fermentas, FD1014)  
3µl FastAP (Fermentas, EF0651)  
6µl 10x FastDigest Buffer  
Xµl H<sub>2</sub>O  
60ul total

**F3. Gel-purify digested *pCFD5-NS* backbone (~6.3kb).**

**F4. Gibson assembly**

Xµl digested *pCFD5-NS* (50ng)  
Xul dsDNA fragment 1 (5ng)  
Xul dsDNA fragment 2 (5ng)  
2.5µl Gibson master mix (NEB, E2611)  
Xµl H<sub>2</sub>O  
5ul total

Incubate reaction at 50°C for 30min.

**F5. Transform ligation into competent cells and grow colonies on LB-agar Ampicillin plates**

**F6. (Optional) Colony PCR to identify candidate pegRNA plasmids**

*pCFD3genoF* ACGTTTTATAACTTATGCCCCCTAAG  
*pCFD3genoR* GCCGAGCACAATTGTCTAGAATGC

Uncut backbone = 587bp  
Correct insert = ~846bp (depends on pegRNA length)

**F7. Culture colonies with LB + Ampicillin and sequence confirm plasmids**

*pCFD3seqF* ACCTACTCAGCCAAGAGGC

## References:

1. F. Port, H. M. Chen, T. Lee, S. L. Bullock, Optimized CRISPR/Cas tools for efficient germline and somatic genome engineering in *Drosophila*. *Proc Natl Acad Sci U S A* **111**, E2967-2976 (2014).
2. F. Port, S. L. Bullock, Augmenting CRISPR applications in *Drosophila* with tRNA-flanked sgRNAs. *Nat Methods* **13**, 852-854 (2016).
3. J. Y. Hsu *et al.*, PrimeDesign software for rapid and simplified design of prime editing guide RNAs. *bioRxiv* 10.1101/2020.05.04.077750 (2020).
4. R. D. Chow, J. S. Chen, J. Shen, S. Chen, pegFinder: A pegRNA designer for CRISPR prime editing. *bioRxiv* 10.1101/2020.05.06.081612 (2020).
